# Supplementary material for: The Adenoviral E1B-55k Protein Present in HEK293 Cells Mediates Abnormal Accumulation of Key WNT Signaling Proteins in Large Cytoplasmic Aggregates
Source: MDPI journal article supplement (doi:10.3390/genes12121920), 2021-11-29
Supplement: s1 [file s1]

**Supplementary Figure S3. Western blot analysis of E1B-55k protein levels in siRNA treated HEK293 cells.**

**Figure S3**

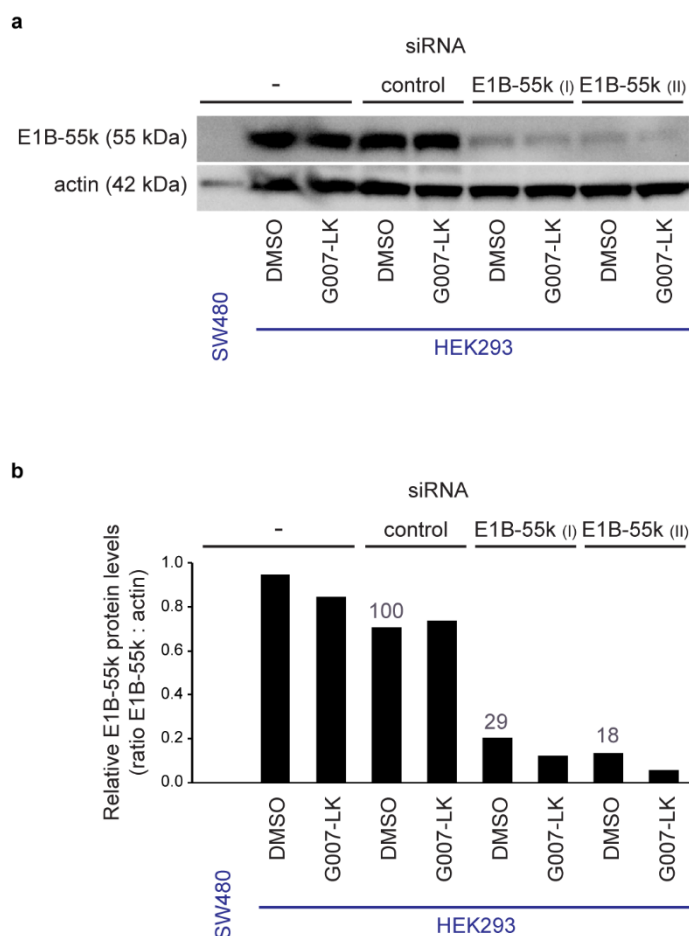

Figure S3. Western blot analysis of E1B-55k protein levels in siRNA treated HEK293 cells.

(a) Western blot analysis of E1B-55k protein levels in untreated (-) and HEK293 cells treated with control siRNA or two independent E1B-55k siRNA constructs (I and II). Both DMSO and G007-LK treated HEK293 cells were analyzed as indicated. As a negative control, protein extracts from a colon carcinoma cell line (SW480), not expressing E1B-55k, was included. Bands for E1B-55k protein and for the actin loading control is shown.

(b) Quantification of E1B-55k protein levels as determined by calculating the ratio of the background subtracted intensities of the E1B-55k bands relative to the corresponding actins band in A (Image Lab Software, Bio-Rad). Treatment with E1B-55k siRNA I and II reduced E1B-55k protein levels to 29 % and 18 % respectively, relative to the protein levels in control siRNA treated cells.
