# Supplementary material for: The Adenoviral E1B-55k Protein Present in HEK293 Cells Mediates Abnormal Accumulation of Key WNT Signaling Proteins in Large Cytoplasmic Aggregates
Source: MDPI journal article supplement (doi:10.3390/genes12121920), 2021-11-29

**Supplementary Figure S1. Localization of key WNT/ $\beta$ -catenin signaling components in the HEK293T cell line.**

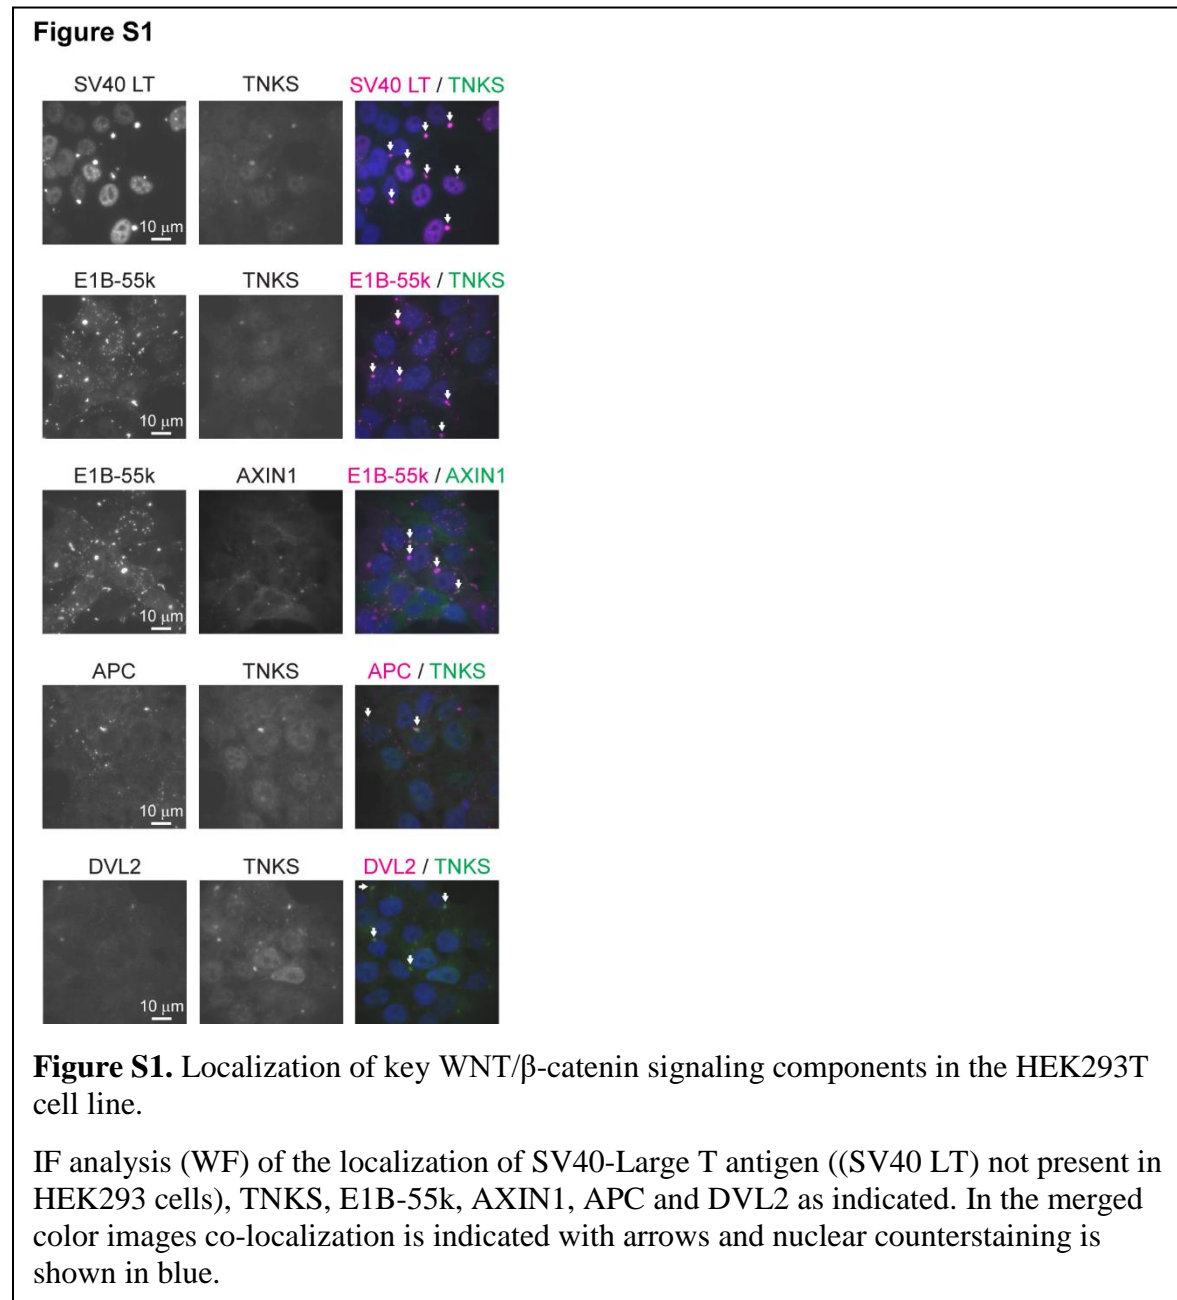

Supplement: s1 [file s1]
