# Supplementary material for: The Adenoviral E1B-55k Protein Present in HEK293 Cells Mediates Abnormal Accumulation of Key WNT Signaling Proteins in Large Cytoplasmic Aggregates
Source: MDPI journal article supplement (doi:10.3390/genes12121920), 2021-11-29
Supplement: s1 [file s1]

**Supplementary Table S1. E1B-55k interacting partners detected by Co-IP**

| Experiment<br>1      | Experiment<br>2      | Identified in both<br>experiments |
|----------------------|----------------------|-----------------------------------|
| <i><u>RAD50</u></i>  | <i><u>RAD50</u></i>  | <i><u>RAD50</u></i>               |
| <i><u>MRE11</u></i>  | <i><u>USP9X</u></i>  | <i><u>USP9X</u></i>               |
| <i><u>USP9X</u></i>  | <i><u>MRE11</u></i>  | <i><u>MRE11</u></i>               |
| <i><u>TP53</u></i>   | <i><u>TP53</u></i>   | <i><u>TP53</u></i>                |
| <i>SDCCAG3</i>       | <i>PRRC2B</i>        | <i>PRRC2B</i>                     |
| <i>KRT78</i>         | <i>PHLDB2</i>        | <i>PHLDB2</i>                     |
| <i>PRRC2B</i>        | <i><u>NBN</u></i>    | <i><u>NBN</u></i>                 |
| <i>ATAD3A</i>        | <i>SNX9</i>          | <i>HADHA</i>                      |
| <i>PHLDB2</i>        | <i>YTHDC2</i>        | <i>WAPL</i>                       |
| <i>ARG1</i>          | <i>HADHA</i>         | <i>TRIM27</i>                     |
| <i><u>NBN</u></i>    | <i>APC</i>           | <i>SDCCAG3</i>                    |
| <i>TGM3</i>          | <i>RAB11FIP2</i>     | <i>BAG2</i>                       |
| <i><u>CASP14</u></i> | <i>WAPL</i>          | <i>IRS4</i>                       |
| <i>MEIOC</i>         | <i>DSG1</i>          | <i>LAMB3</i>                      |
| <i>TNRC6A</i>        | <i>TCOF1</i>         | <i>TNRC6A</i>                     |
| <i>BAG2</i>          | <i>TRIM27</i>        | <i>CUL9</i>                       |
| <i>ZNF318</i>        | <i>SDCCAG3</i>       | <i>ZNF318</i>                     |
| <i>PRC1</i>          | <i>BAG2</i>          | <i><u>CASP14</u></i>              |
| <i>TNRC6B</i>        | <i>IRS4</i>          | <i>MYO1B</i>                      |
| <i>TRAF7</i>         | <i>TCF25</i>         | <i>MEIOC</i>                      |
| <i>LAMB3</i>         | <i>LAMB3</i>         | <i>ERH</i>                        |
| <i>LMO7</i>          | <i><u>TRIM28</u></i> |                                   |
| <i>CUL7</i>          | <i>CLASP1</i>        |                                   |
| <i>AZGP1</i>         | <i>TNRC6A</i>        |                                   |
| <i>ERH</i>           | <i>HAL</i>           |                                   |
| <i>KPRP</i>          | <i>PKP4</i>          |                                   |
| <i>MYO1B</i>         | <i>ZSWIM8</i>        |                                   |
| <i>AKAP8</i>         | <i>CUL9</i>          |                                   |
| <i>ENO1</i>          | <i>ZNF318</i>        |                                   |
| <i><u>GGCT</u></i>   | <i>COIL</i>          |                                   |
| <i>CEP131</i>        | <i>SNX33</i>         |                                   |
| <i>POF1B</i>         | <i>FYCO1</i>         |                                   |
| <i>CORO1C</i>        | <i>WASHC2A</i>       |                                   |
| <i>TRIM27</i>        | <i>PCM1</i>          |                                   |
| <i>HNRNPF</i>        | <i>GTF3C3</i>        |                                   |
| <i>CALML5</i>        | <i>AGTPBP1</i>       |                                   |
| <i>KRT6C</i>         | <i>TNRC6C</i>        |                                   |
| <i>DSC3</i>          | <i>LAMA3</i>         |                                   |
| <i>GIGYF1</i>        | <i>AGRN</i>          |                                   |
| <i>CUL9</i>          | <i>LAMB1</i>         |                                   |
| <i>MYO1C</i>         | <i><u>CASP14</u></i> |                                   |
| <i>MYH10</i>         | <i>RPS24</i>         |                                   |
| <i>ALOX12B</i>       | <i>RPL4</i>          |                                   |
| <i>HADHA</i>         | <i>SBSN</i>          |                                   |
| <i>SERPINB12</i>     | <i>ITIH2</i>         |                                   |
| <i>AUNIP</i>         | <i>VTN</i>           |                                   |
| <i>LIMA1</i>         | <i>MYO1B</i>         |                                   |
| <i>WAPL</i>          | <i>FLNA</i>          |                                   |
| <i>FLG</i>           | <i>CARD10</i>        |                                   |
| <i>DLC1</i>          | <i>MEIOC</i>         |                                   |
| <i>KIF14</i>         | <i>SLC25A11</i>      |                                   |
| <i>DDX17</i>         | <i>AMER1</i>         |                                   |
| <i>EIF4E2</i>        | <i>TJP2</i>          |                                   |
| <i>UNC13C</i>        | <i>BAIAP2L1</i>      |                                   |
| <i>IRS4</i>          | <i>ZSCAN20</i>       |                                   |
| <i>BCLAF1</i>        | <i>FAM83B</i>        |                                   |
| <i>IGHG4</i>         | <i>SBNO1</i>         |                                   |
|                      | <i>AHDC1</i>         |                                   |
|                      | <i>RPL35</i>         |                                   |
|                      | <i>ERH</i>           |                                   |

Proteins in experiment 1 and 2 are sorted according to their "Mascot Score". Proteins detected in both experiments are in italic and previously identified E1B-55k interacting proteins are underlined. Further details can be found in Supplementary Table S2 and S3.
