# Supplementary material for: The Adenoviral E1B-55k Protein Present in HEK293 Cells Mediates Abnormal Accumulation of Key WNT Signaling Proteins in Large Cytoplasmic Aggregates
Source: MDPI journal article supplement (doi:10.3390/genes12121920), 2021-11-29
Supplement: s1 [file s1]

**Supplementary Figure S4. In HEK293 cells with reduced E1B-55k protein levels the distribution of AXIN1, APC and DVL2 is changed from accumulation in aggregates to a more uniform cytoplasmic distribution.**

**Figure S4**

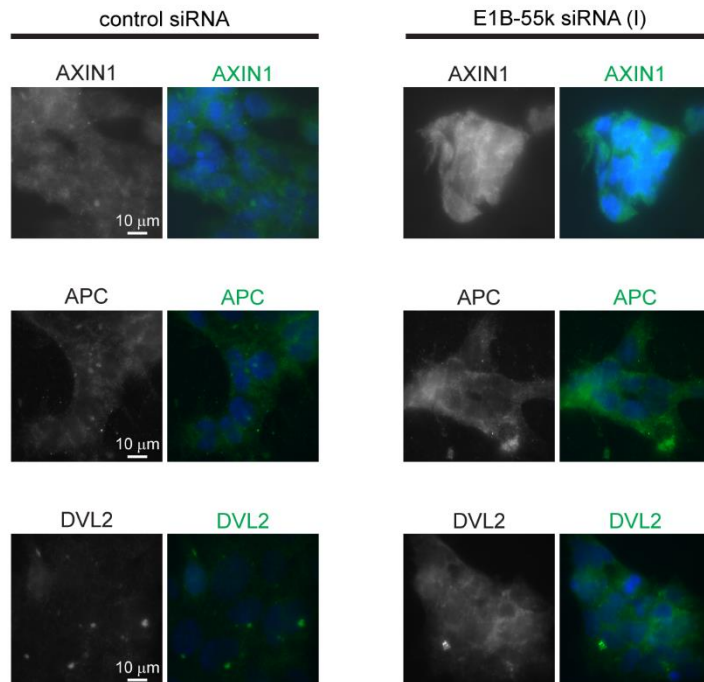

Figure S4. In HEK293 cells with reduced E1B-55k protein levels the distribution of AXIN1, APC and DVL2 is changed from accumulation in aggregates to a more uniform cytoplasmic distribution.

IF analysis (laser WF) of the localization of AXIN1, APC and DVL2 in HEK293 cells treated with control or E1B-55k siRNA. In the merged color images nuclear counterstaining is shown in blue.
