# Supplementary material for: The Adenoviral E1B-55k Protein Present in HEK293 Cells Mediates Abnormal Accumulation of Key WNT Signaling Proteins in Large Cytoplasmic Aggregates
Source: Genes (Basel). 2021 Nov 29;12(12):1920. doi: 10.3390/genes12121920 (PMC8701144; doi:10.3390/genes12121920)
Supplement: Supplementary file 1 [file genes-12-01920-s001.zip › Table S2_and_S3.xlsx]

## Sheet: Sheet1
Supplementary Table S2. E1B-55k interacting partners detected in Co-IP experiment 1.
Accession	Gene name	Description	Coverage	# Peptides	# PSMs	# Unique Peptides	# Protein Groups	# AAs	MW [kDa]	calc. pI	Beads only control	Mouse IgG control	E1B-55k Ab	Protein FDR Confidence Mascot	Exp. q-value Mascot	Mascot Score	# Peptides Mascot
Q92878	RAD50	DNA repair protein RAD50 OS=Homo sapiens GN=RAD50 PE=1 SV=1	27.6677	34	39	34	1	1312	153.797	6.89	Not Found	Not Found	High	High	0	236.183	4
P49959	MRE11	Double-strand break repair protein MRE11A OS=Homo sapiens GN=MRE11A PE=1 SV=3	35.452	21	21	21	1	708	80.543	5.9	Not Found	Not Found	High	High	0	233.407	5
Q93008	USP9X	Probable ubiquitin carboxyl-terminal hydrolase FAF-X OS=Homo sapiens GN=USP9X PE=1 SV=3	6.92607	15	16	15	1	2570	292.094	5.8	Not Found	Not Found	High	High	0	230.375	6
P04637	TP53	Cellular tumor antigen p53 OS=Homo sapiens GN=TP53 PE=1 SV=4	26.2087	10	10	10	1	393	43.625	6.79	Not Found	Not Found	High	High	0	228.007	2
Q96C92	SDCCAG3	Serologically defined colon cancer antigen 3 OS=Homo sapiens GN=SDCCAG3 PE=1 SV=3	17.931	6	7	6	1	435	47.932	5.14	Not Found	Not Found	High	High	0	223.93	3
Q8N1N4	KRT78	Keratin, type II cytoskeletal 78 OS=Homo sapiens GN=KRT78 PE=2 SV=2	11.7308	6	8	4	1	520	56.83	6.02	Not Found	Not Found	High	High	0	221.948	6
Q5JSZ5	PRRC2B	Protein PRRC2B OS=Homo sapiens GN=PRRC2B PE=1 SV=2	1.65994	3	3	3	1	2229	242.817	8.34	Not Found	Not Found	High	High	0	220.295	3
Q9NVI7	ATAD3A	ATPase family AAA domain-containing protein 3A OS=Homo sapiens GN=ATAD3A PE=1 SV=2	7.88644	5	6	5	1	634	71.325	8.98	Not Found	Not Found	High	High	0	218.38	1
Q86SQ0	PHLDB2	Pleckstrin homology-like domain family B member 2 OS=Homo sapiens GN=PHLDB2 PE=1 SV=2	4.46927	5	5	5	1	1253	142.07	7.43	Not Found	Not Found	High	High	0	215.791	3
P05089	ARG1	Arginase-1 OS=Homo sapiens GN=ARG1 PE=1 SV=2	18.9441	4	4	4	1	322	34.713	7.21	Not Found	Not Found	High	High	0	211.97	5
O60934	NBN	Nibrin OS=Homo sapiens GN=NBN PE=1 SV=1	4.24403	3	3	3	1	754	84.906	6.9	Not Found	Not Found	High	High	0	206.407	5
Q08188	TGM3	Protein-glutamine gamma-glutamyltransferase E OS=Homo sapiens GN=TGM3 PE=1 SV=4	4.1847	2	2	2	1	693	76.584	5.86	Not Found	Not Found	High	High	0	201.215	5
P31944	CASP14	Caspase-14 OS=Homo sapiens GN=CASP14 PE=1 SV=2	13.2231	3	3	3	1	242	27.662	5.58	Not Found	Not Found	High	High	0	200.377	4
A2RUB1	MEIOC	Meiosis-specific coiled-coil domain-containing protein MEIOC OS=Homo sapiens GN=MEIOC PE=2 SV=3	2.20588	2	2	2	1	952	107.491	7.12	Not Found	Not Found	High	High	0	198.958	3
Q8NDV7	TNRC6A	Trinucleotide repeat-containing gene 6A protein OS=Homo sapiens GN=TNRC6A PE=1 SV=2	1.47808	2	2	2	1	1962	210.169	7.01	Not Found	Not Found	High	High	0	197.877	3
O95816	BAG2	BAG family molecular chaperone regulator 2 OS=Homo sapiens GN=BAG2 PE=1 SV=1	13.7441	3	3	3	1	211	23.757	6.7	Not Found	Not Found	High	High	0	196.78	2
Q5VUA4	ZNF318	Zinc finger protein 318 OS=Homo sapiens GN=ZNF318 PE=1 SV=2	2.10619	3	3	3	1	2279	250.958	7.2	Not Found	Not Found	High	High	0	191.71	3
O43663	PRC1	Protein regulator of cytokinesis 1 OS=Homo sapiens GN=PRC1 PE=1 SV=2	3.22581	2	2	2	1	620	71.562	6.68	Not Found	Not Found	High	High	0	191.62	1
Q9UPQ9	TNRC6B	Trinucleotide repeat-containing gene 6B protein OS=Homo sapiens GN=TNRC6B PE=1 SV=4	1.20022	2	2	2	1	1833	193.883	6.76	Not Found	Not Found	High	High	0	181.99	2
Q6Q0C0	TRAF7	E3 ubiquitin-protein ligase TRAF7 OS=Homo sapiens GN=TRAF7 PE=1 SV=1	1.49254	1	1	1	1	670	74.561	7.15	Not Found	Not Found	High	High	0	181.43	3
Q13751	LAMB3	Laminin subunit beta-3 OS=Homo sapiens GN=LAMB3 PE=1 SV=1	1.27986	1	1	1	1	1172	129.489	7.21	Not Found	Not Found	High	High	0	177.27	2
Q8WWI1	LMO7	LIM domain only protein 7 OS=Homo sapiens GN=LMO7 PE=1 SV=3	0.891266	1	1	1	1	1683	192.576	8.09	Not Found	Not Found	High	High	0	175.38	5
Q14999	CUL7	Cullin-7 OS=Homo sapiens GN=CUL7 PE=1 SV=2	1.76678	3	3	2	1	1698	191.04	5.87	Not Found	Not Found	High	High	0	174.623	4
P25311	AZGP1	Zinc-alpha-2-glycoprotein OS=Homo sapiens GN=AZGP1 PE=1 SV=2	3.3557	1	1	1	1	298	34.237	6.05	Not Found	Not Found	High	High	0	169.56	3
P84090	ERH	Enhancer of rudimentary homolog OS=Homo sapiens GN=ERH PE=1 SV=1	21.1538	2	2	2	1	104	12.251	5.92	Not Found	Not Found	High	High	0	168.636	4
Q5T749	KPRP	Keratinocyte proline-rich protein OS=Homo sapiens GN=KPRP PE=1 SV=1	7.77202	3	3	3	1	579	64.093	8.27	Not Found	Not Found	High	High	0	168.295	3
O43795	MYO1B	Unconventional myosin-Ib OS=Homo sapiens GN=MYO1B PE=1 SV=3	1.84859	1	1	1	1	1136	131.902	9.38	Not Found	Not Found	High	High	0	168.121	6
O43823	AKAP8	A-kinase anchor protein 8 OS=Homo sapiens GN=AKAP8 PE=1 SV=1	1.87861	1	1	1	1	692	76.061	5.15	Not Found	Not Found	High	High	0	167.47	5
P06733	ENO1	Alpha-enolase OS=Homo sapiens GN=ENO1 PE=1 SV=2	3.68664	2	2	2	1	434	47.139	7.39	Not Found	Not Found	High	High	0	166.22	3
O75223	GGCT	Gamma-glutamylcyclotransferase OS=Homo sapiens GN=GGCT PE=1 SV=1	6.91489	1	1	1	1	188	20.994	5.14	Not Found	Not Found	High	High	0	161.04	2
Q9UPN4	CEP131	Centrosomal protein of 131 kDa OS=Homo sapiens GN=CEP131 PE=1 SV=3	1.47738	1	1	1	1	1083	122.075	8.69	Not Found	Not Found	High	High	0	160.857	4
Q8WVV4	POF1B	Protein POF1B OS=Homo sapiens GN=POF1B PE=1 SV=3	1.86757	1	1	1	1	589	68.022	6.32	Not Found	Not Found	High	High	0	160.39	3
Q9ULV4	CORO1C	Coronin-1C OS=Homo sapiens GN=CORO1C PE=1 SV=1	1.68776	1	1	1	1	474	53.215	7.08	Not Found	Not Found	High	High	0	158.899	3
P14373	TRIM27	Zinc finger protein RFP OS=Homo sapiens GN=TRIM27 PE=1 SV=1	2.72904	1	1	1	1	513	58.452	6.21	Not Found	Not Found	High	High	0	157.823	3
P52597	HNRNPF	Heterogeneous nuclear ribonucleoprotein F OS=Homo sapiens GN=HNRNPF PE=1 SV=3	4.09639	1	1	1	1	415	45.643	5.58	Not Found	Not Found	High	High	0	155.6	4
Q9NZT1	CALML5	Calmodulin-like protein 5 OS=Homo sapiens GN=CALML5 PE=1 SV=2	8.90411	1	1	1	1	146	15.883	4.44	Not Found	Not Found	High	High	0	153.431	6
P48668	KRT6C	Keratin, type II cytoskeletal 6C OS=Homo sapiens GN=KRT6C PE=1 SV=3	52.305	35	108	2	1	564	59.988	8	Not Found	Not Found	Medium	High	0.000653595	112.04	2
Q14574	DSC3	Desmocollin-3 OS=Homo sapiens GN=DSC3 PE=1 SV=3	2.56696	2	2	2	1	896	99.906	6.1	Not Found	Not Found	Medium	High	0.000653595	108.73	1
O75420	GIGYF1	PERQ amino acid-rich with GYF domain-containing protein 1 OS=Homo sapiens GN=GIGYF1 PE=1 SV=2	2.80193	2	2	2	1	1035	114.531	5.39	Not Found	Not Found	Medium	High	0.000653595	108.603	2
Q8IWT3	CUL9	Cullin-9 OS=Homo sapiens GN=CUL9 PE=1 SV=2	0.874056	2	2	1	1	2517	281.049	5.45	Not Found	Not Found	Medium	High	0.000653595	108.531	2
O00159	MYO1C	Unconventional myosin-Ic OS=Homo sapiens GN=MYO1C PE=1 SV=4	1.69332	2	2	2	1	1063	121.606	9.41	Not Found	Not Found	Medium	High	0.000653595	106.997	2
P35580	MYH10	Myosin-10 OS=Homo sapiens GN=MYH10 PE=1 SV=3	0.809717	1	1	1	1	1976	228.858	5.54	Not Found	Not Found	Medium	High	0.000653595	106.082	2
O75342	ALOX12B	Arachidonate 12-lipoxygenase, 12R-type OS=Homo sapiens GN=ALOX12B PE=1 SV=1	1.71184	1	1	1	1	701	80.304	7.64	Not Found	Not Found	Medium	High	0.000653595	104.66	1
P40939	HADHA	Trifunctional enzyme subunit alpha, mitochondrial OS=Homo sapiens GN=HADHA PE=1 SV=2	2.75229	1	1	1	1	763	82.947	9.04	Not Found	Not Found	Medium	High	0.000653595	104.418	2
Q96P63	SERPINB12	Serpin B12 OS=Homo sapiens GN=SERPINB12 PE=1 SV=1	3.45679	1	1	1	1	405	46.247	5.53	Not Found	Not Found	Medium	High	0.00178891	101.71	1
Q9H7T9	AUNIP	Aurora kinase A and ninein-interacting protein OS=Homo sapiens GN=AUNIP PE=1 SV=1	3.36134	1	1	1	1	357	40.228	7.53	Not Found	Not Found	Medium	High	0.00178891	101.472	3
Q9UHB6	LIMA1	LIM domain and actin-binding protein 1 OS=Homo sapiens GN=LIMA1 PE=1 SV=1	1.44928	1	1	1	1	759	85.173	6.84	Not Found	Not Found	Medium	High	0.00178891	95.88	2
Q7Z5K2	WAPL	Wings apart-like protein homolog OS=Homo sapiens GN=WAPL PE=1 SV=1	1.09244	1	1	1	1	1190	132.863	5.44	Not Found	Not Found	Medium	High	0.00232964	90.14	1
P20930	FLG	Filaggrin OS=Homo sapiens GN=FLG PE=1 SV=3	0.837232	2	2	2	1	4061	434.922	9.25	Not Found	Not Found	Medium	High	0.00232964	90.0967	2
Q96QB1	DLC1	Rho GTPase-activating protein 7 OS=Homo sapiens GN=DLC1 PE=1 SV=4	0.65445	1	1	1	1	1528	170.485	6.4	Not Found	Not Found	Medium	High	0.00283607	84.96	1
Q15058	KIF14	Kinesin-like protein KIF14 OS=Homo sapiens GN=KIF14 PE=1 SV=1	1.21359	2	2	2	1	1648	186.375	7.91	Not Found	Not Found	Medium	High	0.00283607	82.6067	3
Q92841	DDX17	Probable ATP-dependent RNA helicase DDX17 OS=Homo sapiens GN=DDX17 PE=1 SV=2	1.64609	1	1	1	1	729	80.222	8.27	Not Found	Not Found	Medium	High	0.00340136	79.7553	2
O60573	EIF4E2	Eukaryotic translation initiation factor 4E type 2 OS=Homo sapiens GN=EIF4E2 PE=1 SV=1	4.08163	1	1	1	1	245	28.344	8.88	Not Found	Not Found	Medium	High	0.00410256	77.1	2
Q8NB66	UNC13C	Protein unc-13 homolog C OS=Homo sapiens GN=UNC13C PE=2 SV=3	0.361337	1	1	1	1	2214	250.754	5.92	Not Found	Not Found	Medium	High	0.00410256	75.8433	2
O14654	IRS4	Insulin receptor substrate 4 OS=Homo sapiens GN=IRS4 PE=1 SV=1	1.27287	1	1	1	1	1257	133.685	8.44	Not Found	Not Found	Medium	High	0.00410256	75.7725	1
Q9NYF8	BCLAF1	Bcl-2-associated transcription factor 1 OS=Homo sapiens GN=BCLAF1 PE=1 SV=2	1.52174	1	1	1	1	920	106.059	9.98	Not Found	Not Found	Medium	High	0.00410256	74.4267	2
P01861	IGHG4	Ig gamma-4 chain C region OS=Homo sapiens GN=IGHG4 PE=1 SV=1	2.75229	1	1	1	1	327	35.918	7.36	Not Found	Not Found	Medium	High	0.00410256	74.19	2
Supplementary Table S3. E1B-55k interacting partners detected in Co-IP experiment 2.
Accession	Gene name	Description	Coverage	# Peptides	# PSMs	# Unique Peptides	# Protein Groups	# AAs	MW [kDa]	calc. pI	Beads only control	Mouse IgG control	E1B-55k Ab	Protein FDR Confidence Mascot	Exp. q-value Mascot	Mascot Score	# Peptides Mascot
Q92878	RAD50	DNA repair protein RAD50 OS=Homo sapiens GN=RAD50 PE=1 SV=1	33.9939	41	50	41	1	1312	153.797	6.89	Not Found	Not Found	High	High	0	1521.7	41
Q93008	USP9X	Probable ubiquitin carboxyl-terminal hydrolase FAF-X OS=Homo sapiens GN=USP9X PE=1 SV=3	13.463	24	26	24	1	2570	292.094	5.8	Not Found	Not Found	High	High	0	711.183	24
P49959	MRE11	Double-strand break repair protein MRE11 OS=Homo sapiens GN=MRE11 PE=1 SV=3	26.8362	14	18	14	1	708	80.543	5.9	Not Found	Not Found	High	High	0	455.445	14
P04637	TP53	Cellular tumor antigen p53 OS=Homo sapiens GN=TP53 PE=1 SV=4	25.9542	7	12	4	1	393	43.625	6.79	Not Found	Not Found	High	High	0	436.61	7
Q5JSZ5	PRRC2B	Protein PRRC2B OS=Homo sapiens GN=PRRC2B PE=1 SV=2	1.97398	3	4	3	1	2229	242.817	8.34	Not Found	Not Found	High	High	0	290.175	3
Q86SQ0	PHLDB2	Pleckstrin homology-like domain family B member 2 OS=Homo sapiens GN=PHLDB2 PE=1 SV=2	8.37989	8	8	8	1	1253	142.07	7.43	Not Found	Not Found	High	High	0	216.19	8
O60934	NBN	Nibrin OS=Homo sapiens GN=NBN PE=1 SV=1	10.8753	7	7	7	1	754	84.906	6.9	Not Found	Not Found	High	High	0	189.024	7
Q9Y5X1	SNX9	Sorting nexin-9 OS=Homo sapiens GN=SNX9 PE=1 SV=1	16.8067	6	6	6	1	595	66.55	5.58	Not Found	Not Found	High	High	0	188.73	6
Q9H6S0	YTHDC2	Probable ATP-dependent RNA helicase YTHDC2 OS=Homo sapiens GN=YTHDC2 PE=1 SV=2	4.61538	4	4	2	1	1430	160.147	8.4	Not Found	Not Found	High	High	0	143.3	4
P40939	HADHA	Trifunctional enzyme subunit alpha, mitochondrial OS=Homo sapiens GN=HADHA PE=1 SV=2	8.12582	4	4	4	1	763	82.947	9.04	Not Found	Not Found	High	High	0	133.237	4
P25054	APC	Adenomatous polyposis coli protein OS=Homo sapiens GN=APC PE=1 SV=2	1.79388	4	4	4	1	2843	311.455	7.8	Not Found	Not Found	High	High	0	132.09	4
Q7L804	RAB11FIP2	Rab11 family-interacting protein 2 OS=Homo sapiens GN=RAB11FIP2 PE=1 SV=1	8.00781	3	3	3	1	512	58.243	9.32	Not Found	Not Found	High	High	0.000788644	115.78	3
Q7Z5K2	WAPL	Wings apart-like protein homolog OS=Homo sapiens GN=WAPL PE=1 SV=1	3.69748	2	2	2	1	1190	132.863	5.44	Not Found	Not Found	High	High	0.000788644	114.53	2
Q02413	DSG1	Desmoglein-1 OS=Homo sapiens GN=DSG1 PE=1 SV=2	4.67112	3	4	3	1	1049	113.676	5.03	Not Found	Not Found	High	High	0.0015083	106.87	3
Q13428	TCOF1	Treacle protein OS=Homo sapiens GN=TCOF1 PE=1 SV=3	2.41935	3	3	3	1	1488	152.015	9.04	Not Found	Not Found	High	High	0.0015083	106.117	3
P14373	TRIM27	Zinc finger protein RFP OS=Homo sapiens GN=TRIM27 PE=1 SV=1	5.06823	2	2	2	1	513	58.452	6.21	Not Found	Not Found	High	High	0.0015083	105.73	2
Q96C92	SDCCAG3	Serologically defined colon cancer antigen 3 OS=Homo sapiens GN=SDCCAG3 PE=1 SV=3	6.43678	2	2	2	1	435	47.932	5.14	Not Found	Not Found	High	High	0.00220751	97.6	2
O95816	BAG2	BAG family molecular chaperone regulator 2 OS=Homo sapiens GN=BAG2 PE=1 SV=1	17.5355	3	3	3	1	211	23.757	6.7	Not Found	Not Found	High	High	0.00220751	96.4623	3
O14654	IRS4	Insulin receptor substrate 4 OS=Homo sapiens GN=IRS4 PE=1 SV=1	1.27287	1	1	1	1	1257	133.685	8.44	Not Found	Not Found	High	High	0.00345781	93.65	1
Q9BQ70	TCF25	Transcription factor 25 OS=Homo sapiens GN=TCF25 PE=1 SV=1	6.95266	2	2	2	1	676	76.619	6.35	Not Found	Not Found	High	High	0.00345781	93.08	2
Q13751	LAMB3	Laminin subunit beta-3 OS=Homo sapiens GN=LAMB3 PE=1 SV=1	1.27986	1	1	1	1	1172	129.489	7.21	Not Found	Not Found	High	High	0.00345781	92.7	1
Q13263	TRIM28	Transcription intermediary factor 1-beta OS=Homo sapiens GN=TRIM28 PE=1 SV=5	5.50898	2	2	2	1	835	88.493	5.77	Not Found	Not Found	High	High	0.00345781	90.57	2
Q7Z460	CLASP1	CLIP-associating protein 1 OS=Homo sapiens GN=CLASP1 PE=1 SV=1	1.88557	2	2	2	1	1538	169.346	9.03	Not Found	Not Found	High	High	0.00371058	85.6811	2
Q8NDV7	TNRC6A	Trinucleotide repeat-containing gene 6A protein OS=Homo sapiens GN=TNRC6A PE=1 SV=2	2.65036	4	4	4	1	1962	210.169	7.01	Not Found	Not Found	High	High	0.00371058	83.93	4
P42357	HAL	Histidine ammonia-lyase OS=Homo sapiens GN=HAL PE=1 SV=1	6.84932	2	2	2	1	657	72.652	6.95	Not Found	Not Found	High	High	0.00371058	79.82	2
Q99569	PKP4	Plakophilin-4 OS=Homo sapiens GN=PKP4 PE=1 SV=2	1.92953	2	2	2	1	1192	131.787	8.94	Not Found	Not Found	High	High	0.00371058	78.8615	2
A7E2V4	ZSWIM8	Zinc finger SWIM domain-containing protein 8 OS=Homo sapiens GN=ZSWIM8 PE=1 SV=1	1.74197	2	2	2	1	1837	197.173	6.8	Not Found	Not Found	High	High	0.00371058	75.84	2
Q8IWT3	CUL9	Cullin-9 OS=Homo sapiens GN=CUL9 PE=1 SV=2	1.47	3	3	3	1	2517	281.049	5.45	Not Found	Not Found	Medium	High	0.00371058	75.06	3
Q5VUA4	ZNF318	Zinc finger protein 318 OS=Homo sapiens GN=ZNF318 PE=1 SV=2	1.36025	2	2	2	1	2279	250.958	7.2	Not Found	Not Found	High	High	0.00397276	73.88	2
P38432	COIL	Coilin OS=Homo sapiens GN=COIL PE=1 SV=1	1.73611	1	2	1	1	576	62.57	9.07	Not Found	Not Found	High	High	0.00397276	73.03	1
Q8WV41	SNX33	Sorting nexin-33 OS=Homo sapiens GN=SNX33 PE=1 SV=1	5.22648	2	2	2	1	574	65.223	6.79	Not Found	Not Found	High	High	0.00397276	67.4	2
Q9BQS8	FYCO1	FYVE and coiled-coil domain-containing protein 1 OS=Homo sapiens GN=FYCO1 PE=1 SV=3	0.947226	1	1	1	1	1478	166.879	4.92	Not Found	Not Found	High	High	0.00397276	65.3	1
Q641Q2	WASHC2A	WASH complex subunit 2A OS=Homo sapiens GN=WASHC2A PE=1 SV=3	1.64057	1	1	1	1	1341	147.095	4.81	Not Found	Not Found	High	High	0.00999445	60.5	1
Q15154	PCM1	Pericentriolar material 1 protein OS=Homo sapiens GN=PCM1 PE=1 SV=4	1.33399	2	2	2	1	2024	228.392	5.02	Not Found	Not Found	Medium	High	0.00999445	60.23	2
Q9Y5Q9	GTF3C3	General transcription factor 3C polypeptide 3 OS=Homo sapiens GN=GTF3C3 PE=1 SV=1	1.58014	1	1	1	1	886	101.208	5.07	Not Found	Not Found	High	Medium	0.0103296	56.61	1
Q9UPW5	AGTPBP1	Cytosolic carboxypeptidase 1 OS=Homo sapiens GN=AGTPBP1 PE=1 SV=3	0.897227	1	1	1	1	1226	138.361	6.15	Not Found	Not Found	High	Medium	0.0107158	55.71	1
Q9HCJ0	TNRC6C	Trinucleotide repeat-containing gene 6C protein OS=Homo sapiens GN=TNRC6C PE=1 SV=3	0.828402	1	1	1	1	1690	175.857	6.96	Not Found	Not Found	High	Medium	0.0115434	54	1
Q16787	LAMA3	Laminin subunit alpha-3 OS=Homo sapiens GN=LAMA3 PE=1 SV=2	0.420042	1	1	1	1	3333	366.414	7.24	Not Found	Not Found	High	Medium	0.0127338	53.17	1
O00468	AGRN	Agrin OS=Homo sapiens GN=AGRN PE=1 SV=5	0.532172	1	1	1	1	2067	217.092	6.39	Not Found	Not Found	High	Medium	0.0127338	52.88	1
P07942	LAMB1	Laminin subunit beta-1 OS=Homo sapiens GN=LAMB1 PE=1 SV=2	1.2318	1	1	1	1	1786	197.909	4.94	Not Found	Not Found	High	Medium	0.0127338	52.29	1
P31944	CASP14	Caspase-14 OS=Homo sapiens GN=CASP14 PE=1 SV=2	5.78512	1	1	1	1	242	27.662	5.58	Not Found	Not Found	High	Medium	0.0127338	51.11	1
P62847	RPS24	40S ribosomal protein S24 OS=Homo sapiens GN=RPS24 PE=1 SV=1	9.02256	1	1	1	1	133	15.413	10.78	Not Found	Not Found	High	Medium	0.0127338	50.81	1
P36578	RPL4	60S ribosomal protein L4 OS=Homo sapiens GN=RPL4 PE=1 SV=5	2.57611	1	1	1	1	427	47.667	11.06	Not Found	Not Found	High	Medium	0.0127338	50.62	1
Q6UWP8	SBSN	Suprabasin OS=Homo sapiens GN=SBSN PE=1 SV=2	3.05085	1	1	1	1	590	60.505	7.01	Not Found	Not Found	High	Medium	0.0127338	50.43	1
P19823	ITIH2	Inter-alpha-trypsin inhibitor heavy chain H2 OS=Homo sapiens GN=ITIH2 PE=1 SV=2	1.58562	1	1	1	1	946	106.397	6.86	Not Found	Not Found	High	Medium	0.0127338	47.99	1
P04004	VTN	Vitronectin OS=Homo sapiens GN=VTN PE=1 SV=1	3.13808	1	1	1	1	478	54.271	5.8	Not Found	Not Found	High	Medium	0.0132916	46.58	1
O43795	MYO1B	Unconventional myosin-Ib OS=Homo sapiens GN=MYO1B PE=1 SV=3	1.84859	1	1	1	1	1136	131.902	9.38	Not Found	Not Found	Medium	Medium	0.0157106	43.67	1
P21333	FLNA	Filamin-A OS=Homo sapiens GN=FLNA PE=1 SV=4	0.491122	1	1	1	1	2647	280.564	6.06	Not Found	Not Found	Medium	Medium	0.0157106	43.12	1
Q9BWT7	CARD10	Caspase recruitment domain-containing protein 10 OS=Homo sapiens GN=CARD10 PE=1 SV=2	1.93798	1	1	1	1	1032	115.859	5.95	Not Found	Not Found	Medium	Medium	0.0170167	42.85	1
A2RUB1	MEIOC	Meiosis-specific coiled-coil domain-containing protein MEIOC OS=Homo sapiens GN=MEIOC PE=2 SV=3	1.47059	1	1	1	1	952	107.491	7.12	Not Found	Not Found	Medium	Medium	0.020854	39.82	1
Q02978	SLC25A11	Mitochondrial 2-oxoglutarate/malate carrier protein OS=Homo sapiens GN=SLC25A11 PE=1 SV=3	5.09554	1	1	1	1	314	34.04	9.91	Not Found	Not Found	Medium	Medium	0.0230719	38.81	1
Q5JTC6	AMER1	APC membrane recruitment protein 1 OS=Homo sapiens GN=AMER1 PE=1 SV=2	1.67401	1	1	1	1	1135	123.952	4.84	Not Found	Not Found	Medium	Medium	0.0233553	38.28	1
Q9UDY2	TJP2	Tight junction protein ZO-2 OS=Homo sapiens GN=TJP2 PE=1 SV=2	1.42857	1	1	1	1	1190	133.876	7.4	Not Found	Not Found	Medium	Medium	0.0268149	37.35	1
Q9UHR4	BAIAP2L1	Brain-specific angiogenesis inhibitor 1-associated protein 2-like protein 1 OS=Homo sapiens GN=BAIAP2L1 PE=1 SV=2	2.93542	1	1	1	1	511	56.847	8.68	Not Found	Not Found	Medium	Medium	0.0301282	35.57	1
P17040	ZSCAN20	Zinc finger and SCAN domain-containing protein 20 OS=Homo sapiens GN=ZSCAN20 PE=2 SV=3	1.82167	1	1	1	1	1043	117.467	6.43	Not Found	Not Found	Medium	Medium	0.0412728	34.29	1
Q5T0W9	FAM83B	Protein FAM83B OS=Homo sapiens GN=FAM83B PE=1 SV=1	2.17606	1	1	1	1	1011	114.729	8.97	Not Found	Not Found	Medium	Medium	0.0473206	34.04	1
A3KN83	SBNO1	Protein strawberry notch homolog 1 OS=Homo sapiens GN=SBNO1 PE=1 SV=1	0.502513	1	1	1	1	1393	154.216	7.88	Not Found	Not Found	Medium	Medium	0.0475598	33.99	1
Q5TGY3	AHDC1	AT-hook DNA-binding motif-containing protein 1 OS=Homo sapiens GN=AHDC1 PE=1 SV=1	0.748596	1	1	1	1	1603	168.245	9.04	Not Found	Not Found	Medium	Medium	0.0477953	33.7	1
P42766	RPL35	60S ribosomal protein L35 OS=Homo sapiens GN=RPL35 PE=1 SV=2	8.13008	1	1	1	1	123	14.543	11.05	Not Found	Not Found	Medium	Medium	0.0477953	33.59	1
P84090	ERH	Enhancer of rudimentary homolog OS=Homo sapiens GN=ERH PE=1 SV=1	10.5769	1	1	1	1	104	12.251	5.92	Not Found	Not Found	Medium	Medium	0.0483672	33.47	1
